# Supplementary material
Source: Elsevier journal article supplement (https://www.sciencedirect.com/science/article/pii/S2173507721001307)
Supplement: mmc1 [file S2173507721001307:mmc1.docx]

**ANEXO I Preguntas de la encuesta**

**- Email address**

**- Nombre, Apellido**

**- ¿Es usted residente o cirujano?**

Residente

Cirujano

**- ¿Cuántos años hace que terminó la residencia?**

< 5 años

5-10 años

> 10 años

**- Nombre de su Hospital**

**- Ciudad**

**- Según los escenarios para diferentes fases de alerta COVID-19 propuestos por la AEC, en que situación se encontraría su centro**

I (escenario casi normal

II (Escenario de alerta leve)

III(Escenario de alerta media)

IV(Escenario de alerta alta)

V(Escenario de emergencia)

**- Cuántas guardias quirúrgicas ha realizado en un mes durante la pandemia por COVID-19?**

< 2

3-5

> 5

**- Cuántos pacientes con colelitiasis sintomática son referidos en su centro habitualmente antes de la pandemia en un mes?**

< 10

10-20

> 20

**- ¿Cuántas colecistectomías totales (urgentes y programads) se realizan en su centro durante un mes (antes de la pandemia de COVID-19)?**

< 10

10-20

> 20

**- Desde la pandemia de COVID-19, ¿cómo cambió su hospital su organización?**

Mi hospital se dedica exclusivamente a pacientes COVID-19

Mi hospital tiene áreas dedicadas exclusivamente a pacientes COVID-19

Mi hospital no trata pacientes COVID-19

**- Desde la pandemia de COVID-19, ¿cambió el manejo de pacientes con colelitiasis en espera de colecistectomía?**

No

Si, no operamos actualmente pacientes con colelitiasis de forma programada

Si, la lista de espera de colecistectomías ha sido transferido a otro centro

**- Desde el inicio de la pandemia de COVID-19, ¿Su centro ha modificado la indicación de cirugía de urgencia para los casos de colecistitis aguda?**

No

SI, preferimos tratamiento conservador y COLECISTOSTOMIA para los casos complicados

**- Durante la pandemia ha notado que los pacientes con colecistitis aguda a la espera de COLECISTOSTOMIA esperan mas días de lo habitual?**

SI

No

Tal vez

**- Antes de la pandemia, en caso de presentar una colecistitis aguda no complicada (tipo I-II de Tokio 18) , ¿cual es su manejo inicial?**

Conservador

Colecistostomía percutánea para pacientes no operables

Colecistéctomía

**- Con respecto a la pregunta anterior, como cambio su actitud durante la pandemia?**

Ningún cambio

Preferimos el tratamiento conservador y colecistostomia si necesario antes de plantear cirugía

**- Actualmente, durante la pandemia, en caso de presentar una colecistitis aguda complicada (>tipo II de Tokio 18) , ¿cual es su manejo inicial?**

Conservador

Colecistostomía percutánea

Colecistéctomía

**- Con respecto a la pregunta anterior, como cambio su actitud durante la pandemia?**

Ningun cambio

Preferimos el tratamiento conservador y colecistostomia si necesario

**- Normalmente en su centro se realizan colecistectomias en regimen de hospital de día?**

Si

No

**- Desde el inicio de la pandemia de COVID-19, ¿Ha percibido menor número de accesos a urgencia por colecistitis aguda?**

No

Sí, un descenso < 20%

Si, un descenso entre el 20-50%

Si, un descenso > 50%

**- Actualmente, durante la pandemia, si indicase una colecistectomía por una colecistitis, ¿Cuál sería su vía de abordaje de inicio?**

Laparoscópica

Abierta a todos los pacientes

**- Antes de la pandemia, si indicase una colecistectomía por una colecistitis, ¿Cuál sería su vía de abordaje de inicio?**

Laparoscópica

Abierta a todos los pacientes

**- Si se realizó una cirugía laparoscópica, ¿utilizó algún sistema de filtro de evacuación de CO2?**

Ninguno

Si, Filtro con Sello de aire

Si, Filtro solamente

Airseal o similar

**- En su opinión, ¿el riesgo de contaminación durante la cirugía del personal por el virus COVID-19 es mayor por laparoscopia?**

Si

No

no lo se

**- Durante la pandemia, respecto al pasado, ha notado que las cirugías electivas o urgentes se están realizando más por cirujanos ya formados que por residentes?**

Si

No

No lo se

**- ¿Cambió su protección durante cualquier cirugía durante la pandemia? (opciones sumatorias)**

Ningún cambio

Mascarilla FFP2-3

Cualquier protección de máscara ocular

EPI

Solamente si sospecha clínica de infección por Covid-19

**- ¿Realiza test rutinarios de SARS-CoV-2 a pacientes con colecistitis urgentes antes de la colecistectomía?**

No

Si, a todos

Si, solo en casos con clínica respiratoria o sospecha de infección por SARS-CoV-2

**- ¿Cómo evalúa a los pacientes con COVID-19 antes de la cirugía? (opción sumatoria)**

PCR

Tac tórax

ecografia

Rx tórax

Serologia

**- En su centro existe un quirófano indipendiente asignado solo para cirugías de pacientes con sospecha o confirmación de COVID-19?**

Si

No

**- Existe algún paciente en su centro que resultó positivo a COVID-19 después de una cirugía programada o urgente?**

No

SI

No lo se

**- Si ha habido casos en relación a la pregunta anterior, el paciente ha tenido una evolución post-operatoria mas complicada que lo esperable?**

Si

No

**- ¿En su centro se realizan test para descartar COVID-19 a todos los cirujanos que actualmente están trabajando?**

Si

No

Solo en aquellos que están realizando cirugías electivas
